# Supplementary material for: AI agent as a simulated patient for history-taking training in clinical clerkship: an example in stomatology
Source: publisher site journal article supplement (doi:10.1515/gme-2024-0025), 2025-03-05
Supplement: Supplementary file 2 [file CUQ-Calculation-after_optimization.xlsx]

## Sheet: Welcome
Chatbot Usability Questionnaire (CUQ) Calculation Tool
	This tool is designed to facilitate quick and easy calculation of CUQ scores. CUQ scores are calculated out of 100, to facilitate comparison with the System Usability Scale (SUS).
	How to use this tool
	1. Select the "Data" tab below
	2. Enter the question scores for each of your participants. Question scores are recorded horizontally and participants are recorded vertically. (There is room for up to 100 participants. Don't worry If you don't use all 100 rows.)
	3. A CUQ score will be calculated for each individual participant.
	4. Once you have entered all your data, select the "result" tab.
	The following data will be displayed in your results:
		i. Mean (and SD) CUQ score for the chatbot under test
		ii. Highest and lowest CUQ Scores for the chatbot under test (and the participants to whom these scores relate)
		iii. Mean (and SD) scores for each question
	If you have any difficulty using this tool, or you have any questions about the CUQ, please contact:
	Samuel Holmes		(holmes-w@ulster.ac.uk)
	Raymond Bond		(rb.bond@ulster.ac.uk)
	CUQ Research Team:
	Samuel Holmes, Ulster University Anne Moorhead, School of Communication & Media/Institute of Nursing Research, Ulster University Raymond Bond, School of Computing, Ulster University Huiru Zheng, School of Computing, Ulster University Vivien Coates, Institute of Nursing Research, Ulster University Michael McTear, School of Computing, Ulster University

## Sheet: Data
Chatbot Usability Questionnaire Data Entry Form
						Chatbot being tested:						Simulated Patient
	Question	1	2	3	4	5	6	7	8	9	10	11	12	13	14	15	16	CUQ Score
	Participant	Please enter question scores below																		Enter your CUQ question scores for each of your participants using the grid on the left. You can copy and paste scores from a CSV file or type them in manually. Individual CUQ scores per participant will be calculated and appear in the "Score" column automatically. Note: Please do not modify any formulas in the "Score" column, as this will affect your results. If you have fewer than 100 participa…
	1	4	2	4	1	4	2	5	2	5	1	4	1	3	2	5	1	84.375
	2	5	1	5	2	5	1	4	1	4	2	5	2	5	4	4	2	84.375
	3	4	2	3	1	3	3	5	2	4	1	4	1	2	1	5	1	78.125
	4	4	2	4	2	5	2	4	2	5	1	5	2	3	2	5	2	81.25
	5	2	3	5	1	4	1	5	3	4	2	4	1	4	3	4	1	76.5625
	6	5	2	4	1	2	2	4	2	5	1	4	2	3	2	5	1	79.6875
	7	4	4	1	2	4	1	5	2	5	1	5	1	2	1	4	2	75
	8	5	2	3	1	5	3	3	1	4	2	4	3	4	3	5	1	76.5625
	9	4	1	5	2	3	2	4	2	3	1	4	1	5	2	5	2	81.25
	10	4	2	2	1	5	1	5	1	4	1	5	2	3	4	4	1	79.6875
	11	5	1	4	3	4	4	4	2	5	2	3	1	2	1	5	2	75
	12	4	5	3	1	3	2	5	2	4	1	4	2	3	2	5	1	73.4375
	13	5	2	5	2	4	1	4	2	5	1	4	2	4	1	4	2	84.375
	14	4	3	4	1	5	3	5	1	5	2	5	1	2	3	5	1	81.25
	15	4	2	3	2	4	2	4	2	4	1	4	2	3	4	4	1	71.875
	16	5	1	4	1	3	1	5	2	5	3	5	1	5	2	5	2	87.5
	17	4	2	5	2	5	2	4	1	4	1	4	1	3	1	4	2	82.8125
	18	5	3	4	1	4	1	5	2	5	2	5	2	2	2	5	1	82.8125
	19	4	2	2	2	2	2	4	3	4	1	4	2	4	4	4	2	65.625
	20	3	1	3	1	5	3	5	2	4	1	3	1	3	3	5	1	78.125
	21	5	2	5	1	4	1	3	1	4	2	4	2	5	2	4	1	84.375
	22	4	1	4	2	3	2	5	2	5	1	5	1	4	1	5	2	85.9375
	23	4	2	3	1	5	1	4	2	4	1	4	1	2	2	4	1	79.6875
	24	5	2	4	2	4	2	5	2	5	1	4	2	3	3	4	2	78.125
	25	4	2	5	2	3	1	4	2	5	2	4	1	4	1	5	2	82.8125
	26	4	2	3	1	4	3	5	1	4	1	5	3	2	4	4	1	73.4375
	27	5	3	4	2	5	2	5	2	5	2	4	2	3	2	5	1	81.25
	28	4	1	5	1	3	4	4	2	5	1	4	1	5	2	5	1	84.375
	29	2	4	4	2	4	1	5	2	5	1	5	2	2	3	5	2	73.4375
	30	4	2	3	1	5	2	4	1	4	2	4	1	4	1	4	2	81.25
	31	5	1	5	1	2	1	5	2	3	1	5	2	3	4	5	1	81.25
	32	4	2	4	2	4	3	4	4	4	1	4	1	2	1	5	2	73.4375
	33	4	5	1	1	5	2	5	2	5	1	4	2	4	2	4	1	75
	34	5	1	5	2	3	1	5	1	5	2	4	2	3	3	5	2	82.8125
	35	4	2	2	1	4	2	4	2	4	1	3	1	2	2	4	1	73.4375
	36	5	3	3	2	5	1	5	1	5	2	4	2	5	4	5	2	81.25
	37	4	2	4	1	4	2	4	2	4	1	5	1	4	1	4	1	84.375
	38	4	1	5	2	2	3	3	3	5	3	4	2	3	2	5	2	70.3125
	39	5	2	3	1	3	2	5	1	4	1	5	1	2	1	5	1	84.375
	40	4	2	4	1	5	1	4	2	5	2	4	2	3	2	4	1	81.25
	41	5	1	5	2	4	2	5	2	4	1	4	1	5	3	5	2	85.9375
	42	4	3	4	1	3	1	5	1	4	1	5	1	4	4	4	1	81.25
	43	4	2	3	2	5	2	4	2	5	1	4	2	2	2	5	2	76.5625
	44	5	2	4	1	4	1	5	2	4	2	4	1	3	3	5	1	82.8125
	45	4	2	5	1	3	3	5	1	5	1	4	2	2	1	5	2	81.25
	46	5	1	4	2	5	2	4	2	5	2	5	2	4	2	4	1	84.375
	47	4	2	3	1	4	1	5	2	4	1	4	1	3	4	5	1	79.6875
	48	4	3	5	2	5	4	5	1	5	2	5	2	5	1	4	2	82.8125
	49	5	1	4	2	3	2	4	2	4	1	4	1	2	3	5	2	76.5625
	50	4	2	3	1	4	1	5	2	5	2	5	2	3	2	4	1	81.25
	51	5	1	5	1	5	2	5	2	4	1	4	1	4	1	5	1	92.1875
	52	4	2	4	2	4	3	4	1	3	2	3	2	2	2	4	2	68.75
	53	4	2	3	1	3	2	5	2	4	1	5	1	3	4	5	1	78.125
	54	5	3	4	2	5	1	5	1	5	1	4	2	4	3	5	1	85.9375
	55	4	1	5	3	4	2	4	2	4	2	4	1	5	1	4	1	82.8125
	56	4	2	4	4	3	2	5	2	5	1	4	1	2	2	5	2	75
	57	5	1	5	1	2	1	5	2	5	2	5	2	3	4	4	2	79.6875
	58	4	4	3	3	5	2	4	1	4	1	4	3	4	2	5	1	75
	59	4	2	3	1	4	1	5	2	5	1	5	1	2	3	5	2	81.25
	60	5	1	2	2	3	3	5	2	3	2	4	2	3	1	5	2	73.4375
	61	4	2	1	2	5	4	3	1	4	1	3	1	5	4	4	2	68.75
	62	5	2	5	2	4	1	4	2	5	2	3	2	2	2	5	2	78.125
	63	4	3	4	3	3	1	5	1	3	1	5	3	4	3	4	1	75

## Sheet: Lookup
Score	P
84.375	1
84.375	2
78.125	3
81.25	4
76.5625	5
79.6875	6
75	7
76.5625	8
81.25	9
79.6875	10
75	11
73.4375	12
84.375	13
81.25	14
71.875	15
87.5	16
82.8125	17
82.8125	18
65.625	19
78.125	20
84.375	21
85.9375	22
79.6875	23
78.125	24
82.8125	25
73.4375	26
81.25	27
84.375	28
73.4375	29
81.25	30
81.25	31
73.4375	32
75	33
82.8125	34
73.4375	35
81.25	36
84.375	37
70.3125	38
84.375	39
81.25	40
85.9375	41
81.25	42
76.5625	43
82.8125	44
81.25	45
84.375	46
79.6875	47
82.8125	48
76.5625	49
81.25	50
92.1875	51
68.75	52
78.125	53
85.9375	54
82.8125	55
75	56
79.6875	57
75	58
81.25	59
73.4375	60
68.75	61
78.125	62
75	63
#REF!	#REF!
#REF!	#REF!
#REF!	#REF!
#REF!	#REF!
#REF!	#REF!
#REF!	#REF!
#REF!	#REF!
#REF!	#REF!
#REF!	#REF!
#REF!	#REF!
#REF!	#REF!
#REF!	#REF!
#REF!	#REF!
#REF!	#REF!
#REF!	#REF!
#REF!	#REF!
#REF!	#REF!
#REF!	#REF!
#REF!	#REF!
#REF!	#REF!
#REF!	#REF!
#REF!	#REF!
#REF!	#REF!
#REF!	#REF!
#REF!	#REF!
#REF!	#REF!
#REF!	#REF!
#REF!	#REF!
#REF!	#REF!
#REF!	#REF!
#REF!	#REF!
#REF!	#REF!
#REF!	#REF!
#REF!	#REF!
#REF!	#REF!
#REF!	#REF!
#REF!	#REF!

## Sheet: Result
Chatbot Usability Questionnaire Results
											Mean Question Scores
		Results
		Chatbot	Simulated Patient									Q	Score
												1	4.28571	±	0.658164
		Participants	63									2	2.06349	±	0.948224
												3	3.7619	±	1.08827
		CUQ Score	79.3±5.1									4	1.60317	±	0.684852
												5	3.90476	±	0.945521
		Lowest Score	65.625		Participant		19					6	1.90476	±	0.89288
												7	4.49206	±	0.61887
		Highest Score	92.1875		Participant		51					8	1.77778	±	0.607598
												9	4.39683	±	0.636008
		Median Score	81.25		Participant		4					10	1.4127	±	0.557498
												11	4.2381	±	0.61472
												12	1.5873	±	0.612634
	This is the results page. Mean CUQ score, lowest, highest and median scores are above. Mean scores per question are on the right. Note: It is normal for Median Score participant to be listed as N/A if you have an even number of participants!											13	3.26984	±	1.05044
												14	2.33333	±	1.06256
												15	4.5873	±	0.496274
												16	1.47619	±	0.503444
																			±
																		cuqmean	79.3
																		sd	5.1
