# Supplementary material for: AI agent as a simulated patient for history-taking training in clinical clerkship: an example in stomatology
Source: publisher site journal article supplement (doi:10.1515/gme-2024-0025), 2025-03-05
Supplement: Supplementary file 3 [file CUQ-Calculation-before_optimization.xlsx]

## Sheet: Welcome
Chatbot Usability Questionnaire (CUQ) Calculation Tool
	This tool is designed to facilitate quick and easy calculation of CUQ scores. CUQ scores are calculated out of 100, to facilitate comparison with the System Usability Scale (SUS).
	How to use this tool
	1. Select the "Data" tab below
	2. Enter the question scores for each of your participants. Question scores are recorded horizontally and participants are recorded vertically. (There is room for up to 100 participants. Don't worry If you don't use all 100 rows.)
	3. A CUQ score will be calculated for each individual participant.
	4. Once you have entered all your data, select the "result" tab.
	The following data will be displayed in your results:
		i. Mean (and SD) CUQ score for the chatbot under test
		ii. Highest and lowest CUQ Scores for the chatbot under test (and the participants to whom these scores relate)
		iii. Mean (and SD) scores for each question
	If you have any difficulty using this tool, or you have any questions about the CUQ, please contact:
	Samuel Holmes		(holmes-w@ulster.ac.uk)
	Raymond Bond		(rb.bond@ulster.ac.uk)
	CUQ Research Team:
	Samuel Holmes, Ulster University Anne Moorhead, School of Communication & Media/Institute of Nursing Research, Ulster University Raymond Bond, School of Computing, Ulster University Huiru Zheng, School of Computing, Ulster University Vivien Coates, Institute of Nursing Research, Ulster University Michael McTear, School of Computing, Ulster University

## Sheet: Data
Chatbot Usability Questionnaire Data Entry Form
						Chatbot being tested:						Before Optimization
	Question	1	2	3	4	5	6	7	8	9	10	11	12	13	14	15	16	CUQ Score
	Participant	Please enter question scores below																		Enter your CUQ question scores for each of your participants using the grid on the left. You can copy and paste scores from a CSV file or type them in manually. Individual CUQ scores per participant will be calculated and appear in the "Score" column automatically. Note: Please do not modify any formulas in the "Score" column, as this will affect your results. If you have fewer than 100 participa…
	1	3	3	3	1	3	3	3	2	4	2	4	2	2	3	4	2	62.5
	2	2	2	5	2	2	3	3	2	2	1	5	1	3	2	3	1	67.1875
	3	4	4	4	2	3	2	5	1	4	1	4	3	2	3	5	2	70.3125
	4	1	3	3	1	4	3	4	2	5	2	3	1	4	5	4	1	65.625
	5	3	5	4	2	3	5	3	2	3	1	4	2	2	3	3	2	54.6875
	6	2	3	5	1	1	3	2	1	4	2	5	4	3	1	5	1	67.1875
	7	3	4	3	2	3	4	3	2	4	1	4	1	1	3	4	2	59.375
	8	2	3	2	1	2	3	5	1	5	1	3	2	2	4	2	1	60.9375
	9	4	5	4	2	3	2	3	2	2	2	5	1	3	2	3	3	62.5
	10	3	2	3	3	4	3	4	3	4	1	4	3	2	3	5	2	64.0625
	11	4	3	5	1	3	3	3	2	3	2	3	2	4	3	4	1	68.75
	12	5	4	4	2	2	2	5	1	4	1	5	1	3	5	3	2	70.3125
	13	2	5	3	1	1	3	3	2	5	1	4	4	2	2	5	1	59.375
	14	3	2	5	2	3	4	4	2	4	2	3	1	3	3	4	2	67.1875
	15	4	3	4	2	4	3	5	1	3	1	5	3	4	1	3	3	73.4375
	16	1	5	3	1	2	1	3	2	4	2	4	2	2	2	4	1	60.9375
	17	2	4	5	2	3	3	5	4	2	1	4	1	5	3	5	2	67.1875
	18	3	2	2	1	3	3	4	2	4	1	5	2	2	5	4	1	65.625
	19	2	3	4	2	2	2	3	1	4	2	3	4	3	3	2	2	56.25
	20	1	4	3	1	4	3	4	2	3	1	4	1	4	4	5	3	64.0625
	21	4	5	5	2	3	3	5	2	5	2	2	2	2	3	4	2	64.0625
	22	2	2	4	2	1	4	3	1	4	1	4	3	3	2	3	1	62.5
	23	3	3	3	1	3	3	4	2	5	1	5	1	2	1	4	2	73.4375
	24	1	3	5	2	2	3	2	2	4	2	4	2	1	3	5	1	59.375
	25	3	4	4	1	4	4	3	1	3	1	3	1	3	3	3	2	64.0625
	26	4	5	3	2	3	3	5	2	4	1	5	4	4	1	4	1	70.3125
	27	2	2	5	1	3	2	3	3	4	2	4	3	2	2	5	3	65.625
	28	5	3	4	2	2	3	4	2	5	1	5	2	3	3	3	2	70.3125
	29	3	4	3	2	1	3	5	2	3	1	3	1	4	5	4	2	59.375
	30	1	5	2	1	4	4	3	1	4	2	4	3	2	4	5	1	56.25
	31	2	3	5	2	3	3	5	2	2	1	2	4	3	3	2	2	56.25
	32	3	2	4	2	3	3	4	2	4	2	5	1	1	1	3	3	67.1875
	33	4	3	3	1	2	3	3	1	4	1	4	2	4	3	4	1	70.3125
	34	2	4	5	3	4	5	5	2	3	1	3	3	2	2	5	2	60.9375
	35	1	5	4	2	3	3	4	4	4	1	5	1	3	3	3	1	60.9375
	36	3	3	3	1	3	3	3	2	5	2	4	4	4	5	4	2	60.9375
	37	2	4	5	2	4	4	5	2	4	2	5	2	5	4	5	3	68.75
	38	4	3	4	2	2	3	4	2	4	1	4	1	2	3	4	1	68.75
	39	3	2	3	1	3	3	3	1	5	2	3	2	3	2	3	2	67.1875
	40	2	5	2	2	3	2	4	2	3	2	4	1	1	1	5	1	62.5
	41	4	3	5	1	4	3	5	1	4	1	5	4	4	3	4	2	76.5625
	42	3	4	4	2	1	4	3	2	4	2	2	3	2	5	2	3	43.75
	43	1	5	3	2	3	3	4	2	2	1	4	2	3	3	5	1	59.375
	44	2	3	5	1	2	3	5	4	4	2	5	1	4	2	3	2	68.75
	45	3	2	4	2	4	3	2	2	5	1	3	3	1	3	4	1	64.0625
	46	4	4	3	1	3	3	5	1	4	3	4	2	2	1	5	2	70.3125
	47	5	5	5	2	3	4	4	2	3	2	5	1	3	3	4	3	65.625
	48	2	3	4	3	1	3	5	2	4	3	4	5	5	4	3	2	54.6875
	49	3	4	5	2	2	1	4	3	4	2	3	2	4	5	5	1	65.625
	50	1	3	4	2	3	3	5	2	5	3	5	1	2	3	4	2	65.625
	51	2	5	3	1	4	5	4	2	4	2	4	3	3	2	2	3	54.6875
	52	4	2	5	2	3	3	5	1	4	2	3	2	1	3	5	2	70.3125
	53	3	4	4	1	2	3	4	2	3	3	5	1	4	1	4	1	70.3125
	54	2	5	5	2	3	3	5	2	4	2	4	4	2	3	3	2	57.8125
	55	1	3	4	3	4	4	2	1	2	2	5	3	3	5	5	2	54.6875
	56	3	4	2	2	3	3	5	2	4	2	4	2	1	2	4	1	62.5
	57	4	5	5	1	5	3	4	4	4	1	2	1	5	3	5	2	71.875
	58	2	2	4	3	3	5	5	2	5	2	5	3	4	4	4	3	62.5
	59	3	3	5	1	4	3	4	5	4	1	4	2	2	3	5	2	67.1875
	60	4	2	4	2	3	3	5	2	4	2	5	1	3	1	4	1	78.125
	61	3	3	5	2	2	4	4	2	3	1	4	4	1	2	5	2	60.9375
	62	1	5	4	2	1	2	5	5	5	2	5	2	5	5	4	2	57.8125
	63	2	4	5	3	3	5	4	3	4	1	4	1	4	3	5	1	65.625

## Sheet: Lookup
Score	P
62.5	1
67.1875	2
70.3125	3
65.625	4
54.6875	5
67.1875	6
59.375	7
60.9375	8
62.5	9
64.0625	10
68.75	11
70.3125	12
59.375	13
67.1875	14
73.4375	15
60.9375	16
67.1875	17
65.625	18
56.25	19
64.0625	20
64.0625	21
62.5	22
73.4375	23
59.375	24
64.0625	25
70.3125	26
65.625	27
70.3125	28
59.375	29
56.25	30
56.25	31
67.1875	32
70.3125	33
60.9375	34
60.9375	35
60.9375	36
68.75	37
68.75	38
67.1875	39
62.5	40
76.5625	41
43.75	42
59.375	43
68.75	44
64.0625	45
70.3125	46
65.625	47
54.6875	48
65.625	49
65.625	50
54.6875	51
70.3125	52
70.3125	53
57.8125	54
54.6875	55
62.5	56
71.875	57
62.5	58
67.1875	59
78.125	60
60.9375	61
57.8125	62
65.625	63
#REF!	#REF!
#REF!	#REF!
#REF!	#REF!
#REF!	#REF!
#REF!	#REF!
#REF!	#REF!
#REF!	#REF!
#REF!	#REF!
#REF!	#REF!
#REF!	#REF!
#REF!	#REF!
#REF!	#REF!
#REF!	#REF!
#REF!	#REF!
#REF!	#REF!
#REF!	#REF!
#REF!	#REF!
#REF!	#REF!
#REF!	#REF!
#REF!	#REF!
#REF!	#REF!
#REF!	#REF!
#REF!	#REF!
#REF!	#REF!
#REF!	#REF!
#REF!	#REF!
#REF!	#REF!
#REF!	#REF!
#REF!	#REF!
#REF!	#REF!
#REF!	#REF!
#REF!	#REF!
#REF!	#REF!
#REF!	#REF!
#REF!	#REF!
#REF!	#REF!
#REF!	#REF!

## Sheet: Result
Chatbot Usability Questionnaire Results
											Mean Question Scores
		Results
		Chatbot	Before Optimization									Q	Score
												1	2.69841	±	1.11637
		Participants	63									2	3.52381	±	1.06039
												3	3.92063	±	0.955486
		CUQ Score	64.2±6.1									4	1.73016	±	0.627498
												5	2.80952	±	0.947954
		Lowest Score	43.75		Participant		42					6	3.14286	±	0.839684
												7	3.95238	±	0.940634
		Highest Score	78.125		Participant		60					8	2.04762	±	0.923328
												9	3.8254	±	0.852694
		Median Score	64.0625		Participant		10					10	1.5873	±	0.612634
												11	4.01587	±	0.888857
												12	2.1746	±	1.115
	This is the results page. Mean CUQ score, lowest, highest and median scores are above. Mean scores per question are on the right. Note: It is normal for Median Score participant to be listed as N/A if you have an even number of participants!											13	2.8254	±	1.15758
												14	2.90476	±	1.201
												15	3.95238	±	0.940634
												16	1.79365	±	0.699279
																			±
																		cuqmean	64.2
																		sd	6.1
