# Supplementary material for: AI agent as a simulated patient for history-taking training in clinical clerkship: an example in stomatology
Source: publisher site journal article supplement (doi:10.1515/gme-2024-0025), 2025-03-05
Supplement: Supplementary file 5 [file j_gme-2024-0025_suppl_005.docx]

Supplementary Table 1. Lessons in clinical clerkship of the five-year undergraduate students majoring in clinical medicine

| **Sequence** | **Teaching Content** |
| --- | --- |
| 1 | Oral Hygiene and Care Methods, Oral Examination and Medical Record Keeping |
| 2 | Caries and Periapical Diseases, **Differential Diagnosis and Treatment of Toothache** |
| 3 | Relationship between Oral Diseases and Systemic Diseases; **Oral Mucosal Diseases** |
| 4 | Edentulism, Tooth Restoration Methods (Implants); Prevention and Treatment of Dental and Jaw Malocclusions, Malocclusion and Orthodontics |
| 5 | Local Anesthesia in Oral Cavity, Tooth Extraction; **Oral and Maxillofacial Tumors** |
| 6 | **Maxillofacial Infections**, Maxillofacial Injuries; Maxillofacial Neural Diseases, **Temporomandibular Joint Diseases** |

**Bold** fonts indicate the teaching content including history taking training.
